# Supplementary material for: CDKN2A/CDK4 Status in Greek Patients with Familial Melanoma and Association with Clinico-epidemiological Parameters
Source: PubMed Central journal article supplement (PMC6572781; doi:10.2340/00015555-2969), 2018-10-10
Supplement: NIHMS1016697-supplement-supplemental_figure.pdf [file NIHMS1016697-supplement-supplemental_figure.pdf]

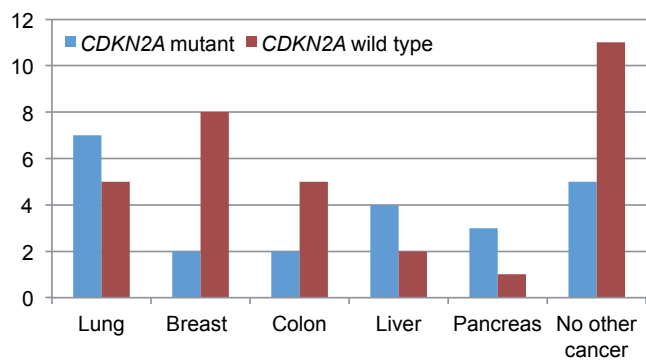

**Fig. S1. Presence of cancer family history in melanoma-prone families according to CDKN2A status.**
