# Supplementary material for: CDKN2A/CDK4 Status in Greek Patients with Familial Melanoma and Association with Clinico-epidemiological Parameters
Source: PubMed Central journal article supplement (PMC6572781; doi:10.2340/00015555-2969), 2018-10-10
Supplement: NIHMS1016697-supplement-suppT1.pdf [file NIHMS1016697-supplement-suppT1.pdf]

**Table SI. Number of melanoma-affected family members according to CDKN2A status**

| Melanoma affected members per family | Frequencies (%)     |                     |         |
|--------------------------------------|---------------------|---------------------|---------|
|                                      | CDKN2A <sup>-</sup> | CDKN2A <sup>+</sup> | p-value |
| 2 (n = 36)                           | 23 (68.9)           | 13 (36.1)           | 0.050*  |
| 3 (n = 10)                           | 2 (20.0)            | 8 (80.0)            |         |
| >3 (n = 6)                           | 3 (50.0)            | 3 (50.0)            |         |
| Total number of families (n = 52)    | 28 (53.8)           | 24 (46.2)           |         |

\*Fisher's exact test.
