# Supplementary material for: CDKN2A/CDK4 Status in Greek Patients with Familial Melanoma and Association with Clinico-epidemiological Parameters
Source: PubMed Central journal article supplement (PMC6572781; doi:10.2340/00015555-2969), 2018-10-10
Supplement: NIHMS1016697-supplement-suppT2.pdf [file NIHMS1016697-supplement-suppT2.pdf]

**Table SII. Distribution of R\* (rs11547464, rs1805007, rs1805009, rs1805006) and r \*(rs1805005, rs2228479) MC1R polymorphisms in association with CDKN2A status in familial melanoma patients**

| MC1R status                                                                                                                                                                        | CDKN2A status                            |                                          |                            | p-value (overall) |
|------------------------------------------------------------------------------------------------------------------------------------------------------------------------------------|------------------------------------------|------------------------------------------|----------------------------|-------------------|
|                                                                                                                                                                                    | CDKN2A <sup>+</sup><br>(n = 18)<br>n (%) | CDKN2A <sup>-</sup><br>(n = 24)<br>n (%) | Total<br>(n = 42)<br>n (%) |                   |
| R: Homozygotes + heterozygotes (at least 1 of: <i>rs11547464ga</i> , <i>rs1805007ct</i> , <i>rs1805009gc</i> , <i>rs1805006ca</i> )                                                | 3 (16.7)                                 | 3 (12.5)                                 | 6 (14.3)                   | 0.164**           |
| r: Homozygotes + heterozygotes (at least 1 of <i>rs1805005gt</i> , <i>rs2228479ga</i> )                                                                                            | 10 (55.6)                                | 11 (45.8)                                | 21 (50.0)                  |                   |
| R & r – Homozygotes + heterozygotes (at least 1 of: <i>rs11547464ga</i> , <i>rs1805007ct</i> , <i>rs1805009gc</i> , <i>rs1805006ca</i> , <i>rs1805005gt</i> , <i>rs2228479ga</i> ) | 2 (11.1)                                 | 0 (0)                                    | 2 (4.8)                    |                   |
| WT (%)                                                                                                                                                                             | 3 (16.7)                                 | 10 (41.7)                                | 13 (31.0)                  |                   |

\*\*Fisher's exact test. p-value were obtained by testing for a difference in proportions between CDKN2A<sup>+</sup> and CDKN2A<sup>-</sup> with respect to a MC1R status using Fisher's exact test.  
\*Amino acid change of R and r: *rs11547464* (Arg142His), *rs1805007* (Arg151Cys), *rs1805009* (Asp294His), *rs1805006* (Asp84Glu), *rs1805005* (Val60Leu), *rs2228479* (Val92Met), *rs11547464* (Arg142His).
